# Supplementary material for: Crystallization behaviour of polymeric membrane based on polymer PVdF-HFP and Ionic liquid BMIMBF4
Source: Royal Society of Chemistry journal article supplement (doi:10.1039/c4ra07085b), 2014-09-16
Supplement: c4ra07085b1.pdf [file c4ra07085b1.pdf]

## Crystallization behaviour of a polymeric membrane based on the polymer PVdF–HFP and the ionic liquid BMIMBF<sub>4</sub>

Shalu, S. K. Chaurasia and R. K. Singh\*

### Supplementary Information

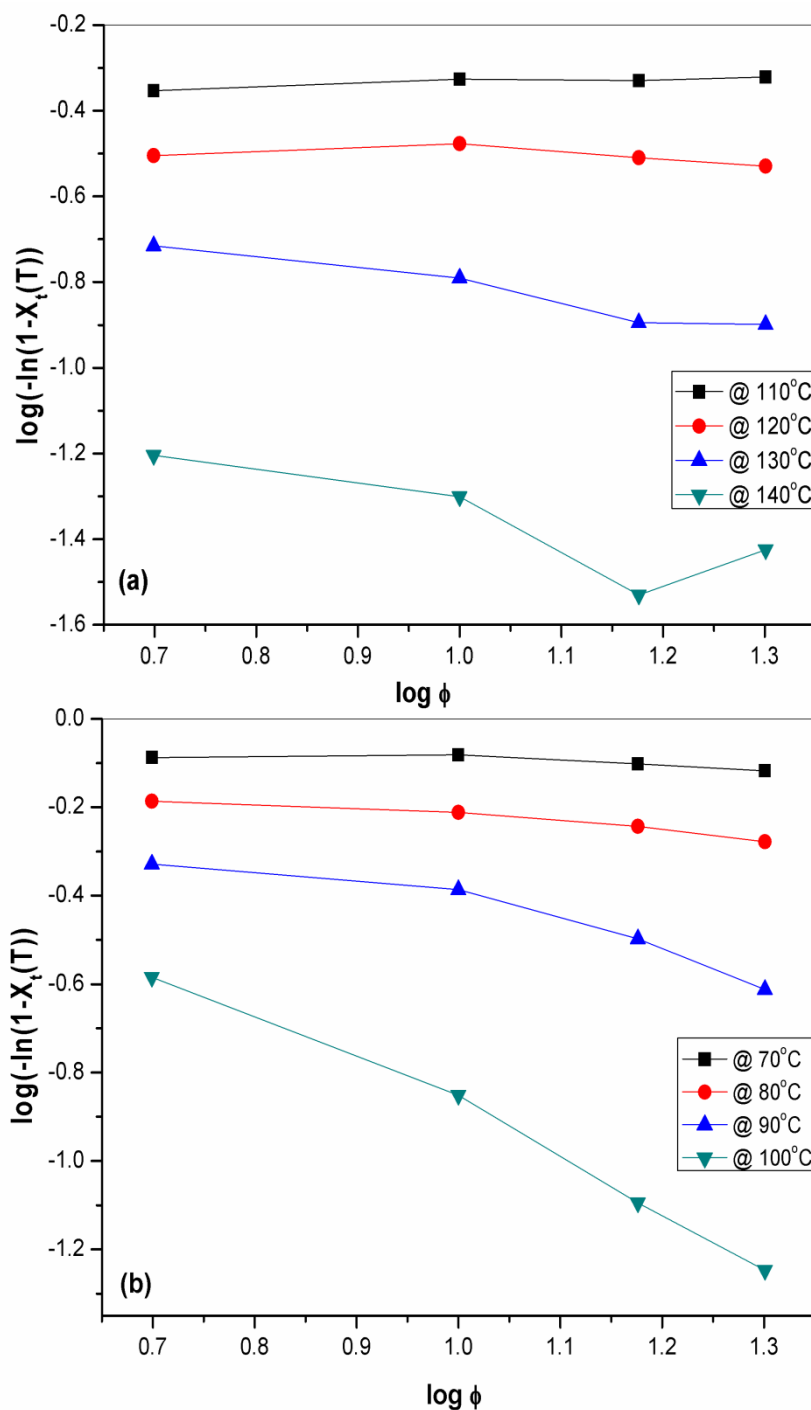

**Fig S1:** Ozawa plots for non-isothermal crystallization process for (a) pristine PVdF-HFP and (b) PVdF-HFP+ 10 wt.% BMIMBF<sub>4</sub>
